# Supplementary material for: PREventing Maternal And Neonatal Deaths (PREMAND): a study protocol for examining social and cultural factors contributing to infant and maternal deaths and near-misses in rural northern Ghana
Source: Springer Nature journal article supplement (doi:10.1186/s12978-016-0142-z), 2016-03-09
Supplement: MOESM3 [file 9769372]

*In case of reply the number and date of this letter should be quoted.*

My Ref. App/PreMAND /02/2015  
Your Ref:

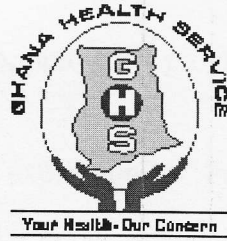

Navrongo Health Research Centre  
**Institutional Review Board**  
Ghana Health Service  
P. O. Box 114  
Navrongo, Ghana  
Tel/Fax: +233-3821-22348  
Email: [irb@navrongo.mimcom.org](mailto:irb@navrongo.mimcom.org)

12<sup>th</sup> February, 2015

---

Dr. John Williams  
Navrongo Health Research Centre  
Ghana Health Service  
P.O. Box 114  
Navrongo, UER

**ETHICS APPROVAL ID: NHRCIRB194**

Dear Dr. Williams,

**Approval of study titled *Preventing Maternal and Neonatal Mortality in Rural Northern Ghana***

Following your satisfactory address of the concerns raised by the NHRCIRB during its full Board review of the above-mentioned protocol, the Board is pleased to grant you approval.

The documents that were reviewed and approved include the following:

- Protocol submission form
- Study protocol version 2.0 dated 16/01/2015
- Questionnaire for the study version 2.0 dated 16/01/2015
- Consent forms – English Version 2.0 dated 16/01/2015 for Adult
- Consent forms – Kasem Version 2.0 dated 16/01/2015 for Adult
- Consent forms – Nankam Version 2.0 dated 16/01/2015 for Adult
- Consent forms – Sissali Version 2.0 dated 16/01/2015 for Adult
- Consent forms – Mampruli Version 2.0 dated 16/01/2015 for Adult
- Screening tools Version 2.0 dated 16/01/2015
- Curriculum Vitae of Investigators

Please note that any amendment to this approved protocol must receive ethical clearance from the NHRCIRB before its implementation.

Should you require a renewal of your approval, a progress report should be submitted two (2) months before the expiration date.

You are also to note that this approval expires on 11<sup>th</sup> February, 2016.

The Board wishes you all the best in this study.

Sincerely,

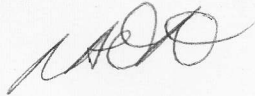

Dr. (Mrs.) Nana Akosua Ansah  
(Vice Chair, NHRCIRB)

Cc: The Director  
NHRC, Navrongo
